# Supplementary material for: Mucispirillum schaedleri: biofilm architecture and age-dependent pleomorphy.
Source: Preprints.org preprint supplement (doi:10.20944/preprints202307.1618.v1), 2023-07-24
Supplement: Supplementary file 1 [file SupplTable1_20JUL2023.docx]

**Supplementary Table S1. Frequencies and viability of rods and round bodies in 3- and 6-day-old cultures.**

| Condition | **3-day-old culture** | **6-day-old culture** |
| --- | --- | --- |
| **Live rods**  Absolute count; mean (SD)  % (SD) | 102 (22)  76.8 (4.3) | 81 (27)  49.4 (12.7) |
| **Dead rods**  Absolute count; mean (SD)  % (SD) | 7 (4)  3 (2.9) | 4 (5)  2.6 (1.6) |
| **Live round bodies**  Absolute count; mean (SD)  % (SD) | 37 (20)  15.3 (6.2) | 43 (9)  36.5 (4) |
| **Dead round bodies**  Absolute count; mean (SD)  % (SD) | 11 (6)  5 (1.9) | 20 (20)  11.5 (9.2) |

SD = standard deviation. For each experimental condition per experiment, cell counts were obtained from 9 scanned images and averaged. Data represent the mean counts from 4 independent experiments.
