# Supplementary material for: Mucispirillum schaedleri: biofilm architecture and age-dependent pleomorphy.
Source: Preprints.org preprint supplement (doi:10.20944/preprints202307.1618.v1), 2023-07-24
Supplement: Supplementary file 4 [file supplementary]

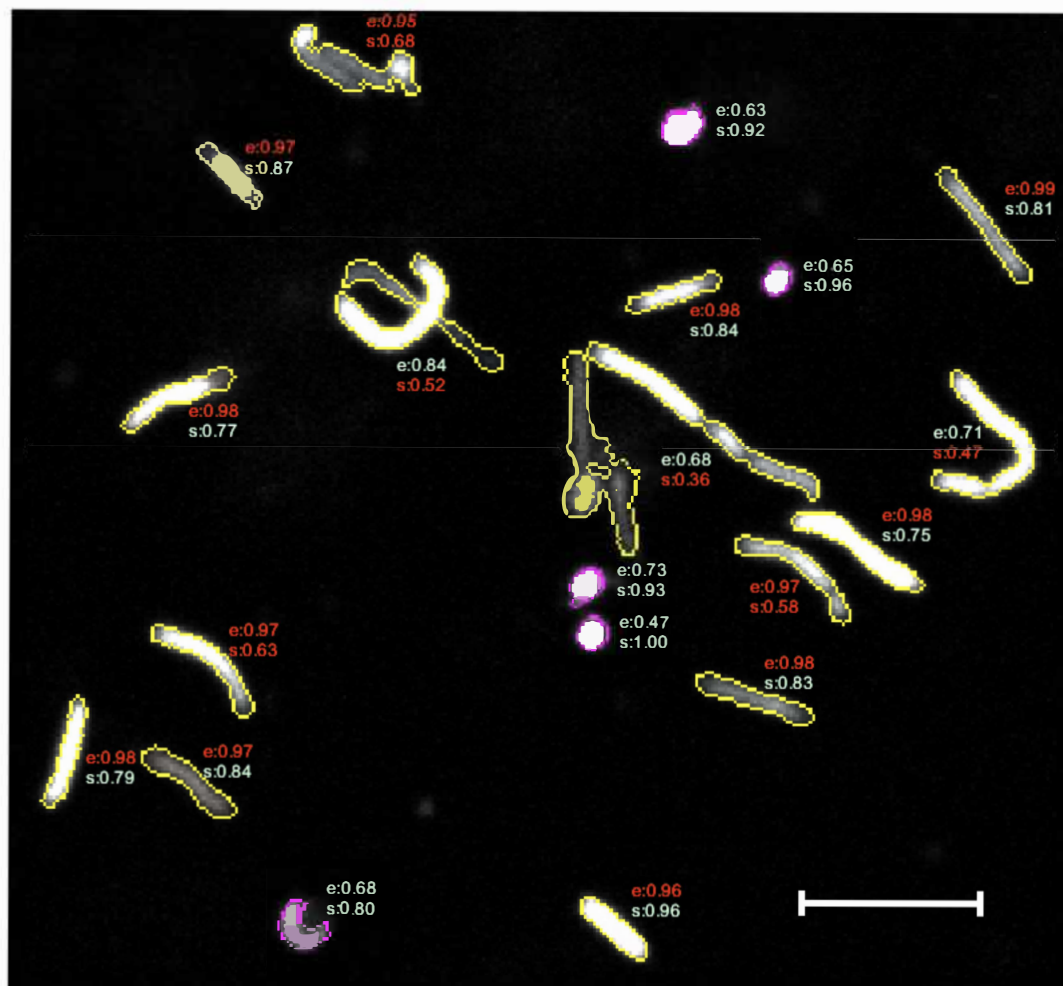

**Supplementary Figure S1. Identification of round bodies and rods based on *Eccentricity* and *Solidity*.** Objects outlined in fuchsia were identified as round bodies and objects outlined in yellow were identified as rods. *Eccentricity* (e) and *Solidity* (s) values are indicated beside each segmented object. A round-body corresponded to an *Eccentricity* value lower than 0.9 and a *Solidity* value greater than 0.7 (in white). All other values (in red) are associated with a rod-like shape. Bar=5 $\mu$ m.
