# Supplementary figures and images for: Mucispirillum schaedleri: biofilm architecture and age-dependent pleomorphy.
Source: Preprints.org preprint supplement (doi:10.20944/preprints202307.1618.v1), 2023-07-24

Figure 1.

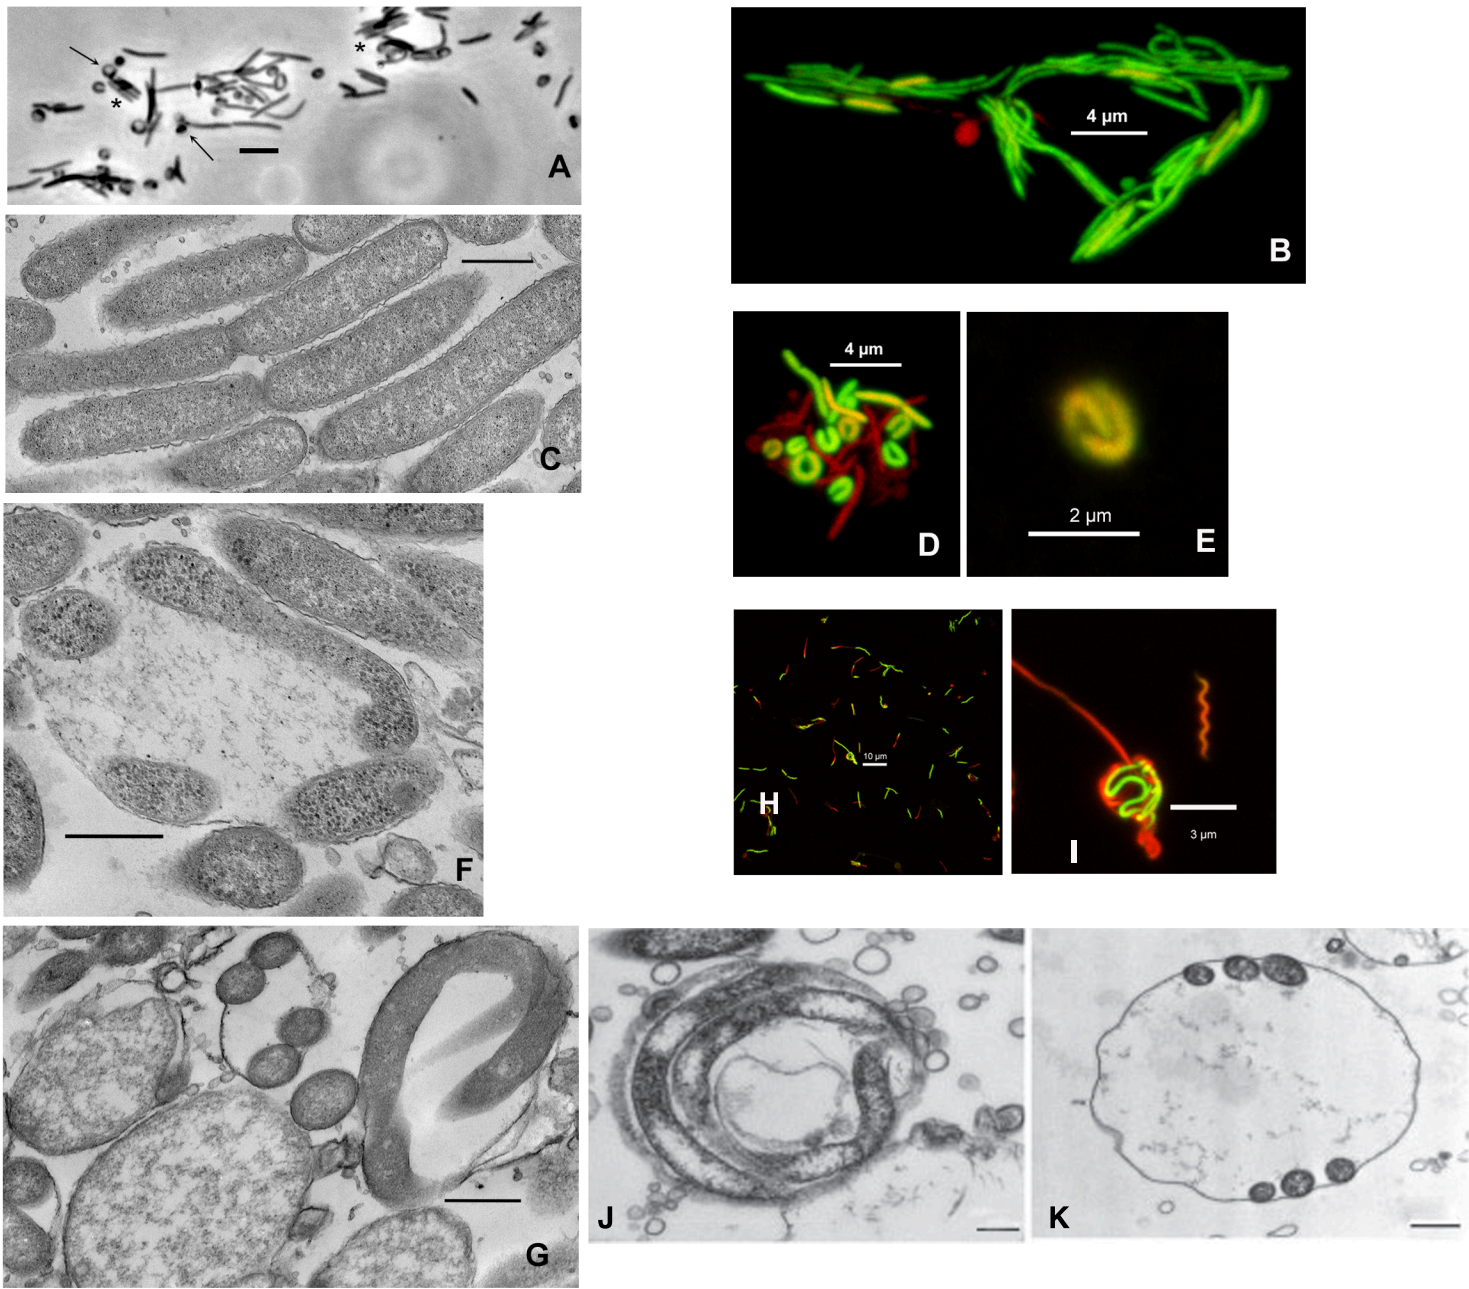

Figure 2.

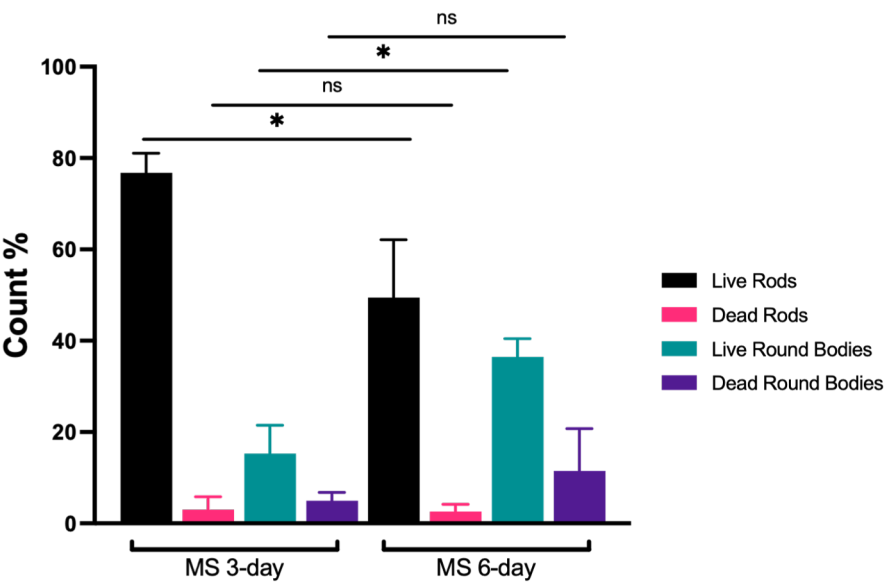

**Figure 3.**

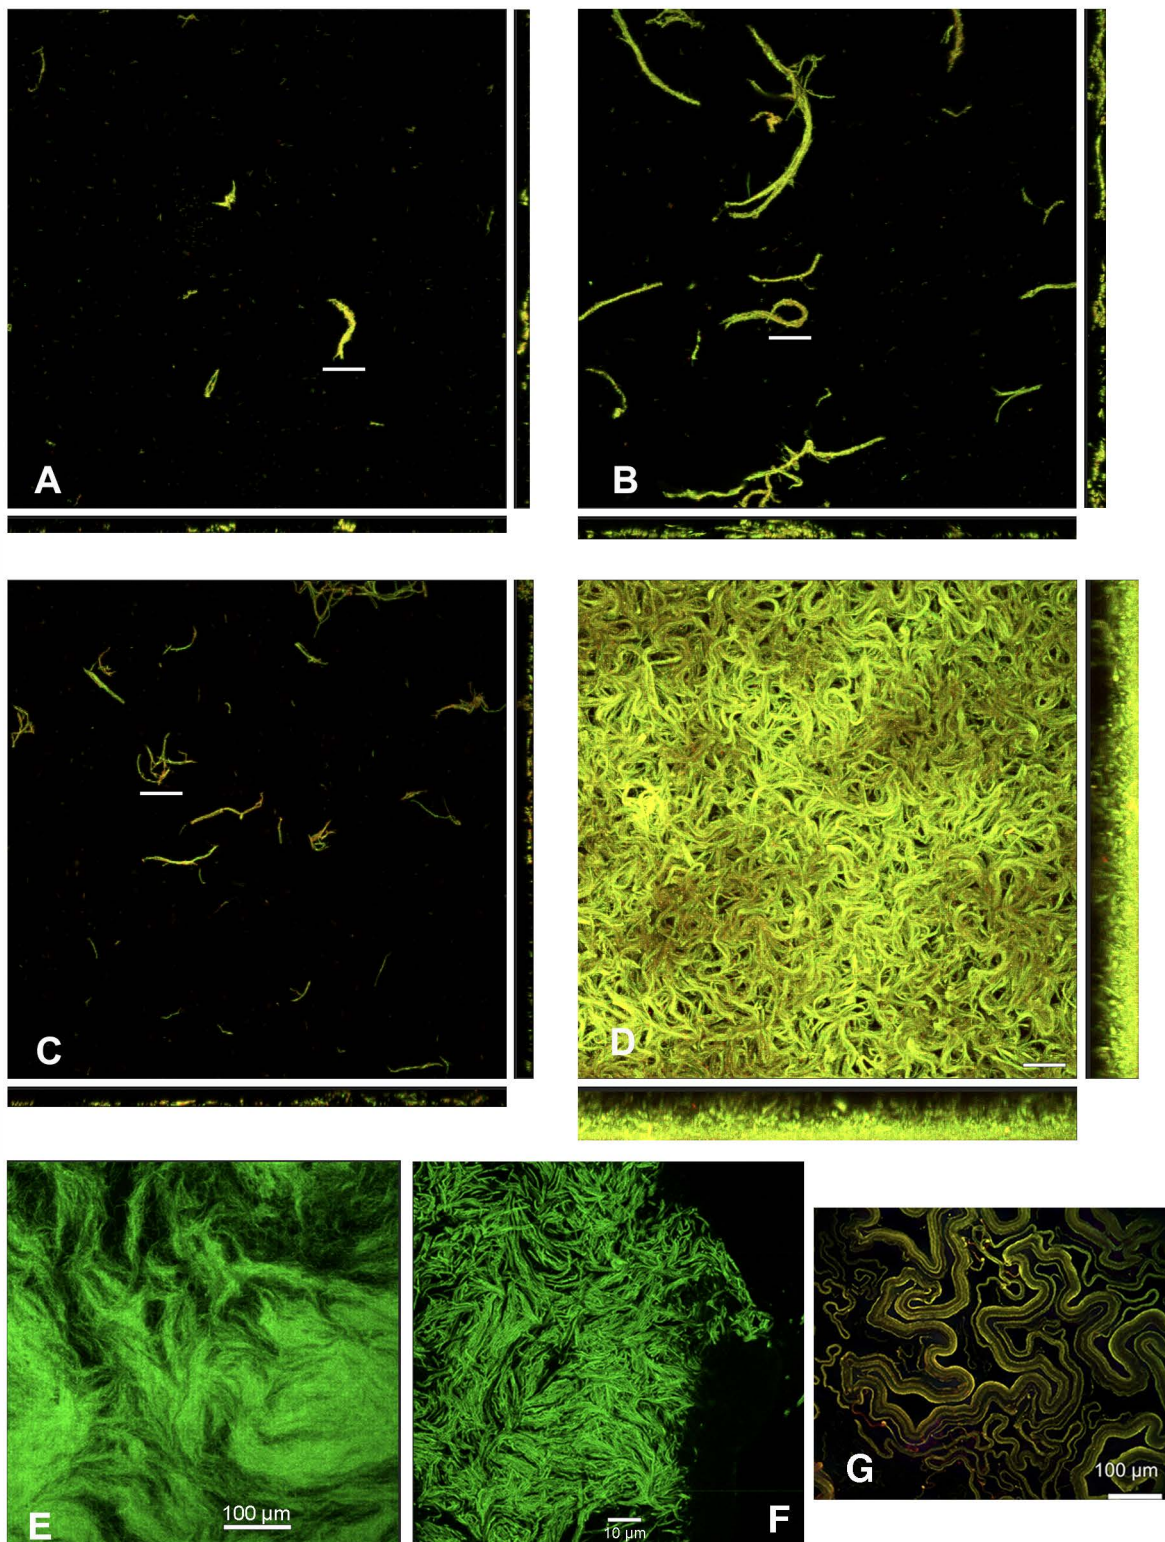

**Figure 4.**

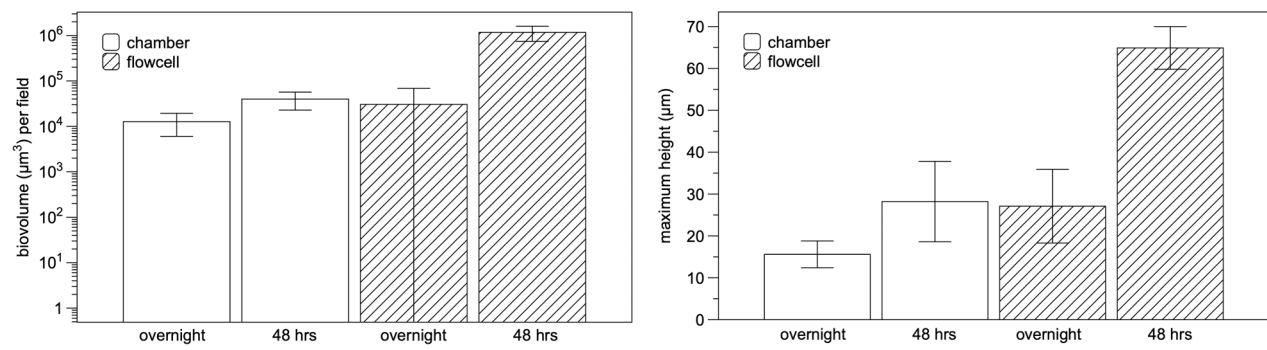



**Figure 5.**

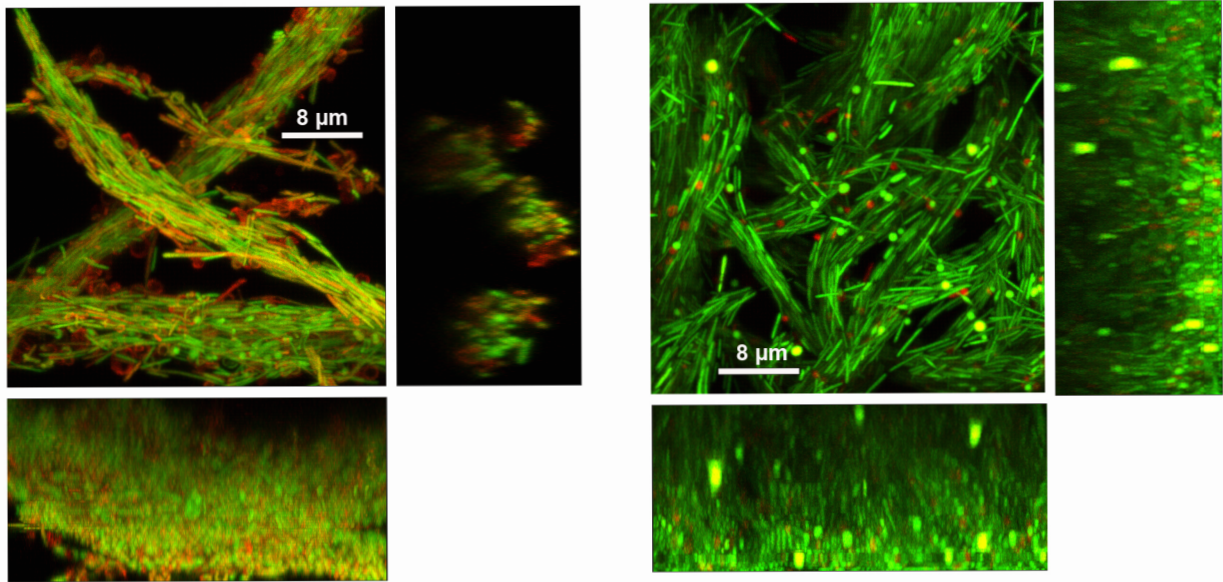

**Figure 6**

Supplement: Supplementary file 3 [file supplementary]
